# Supplementary material for: Enhanced Emulsifying Ability of Deoxycholate through Dynamic Interaction with Layered Double Hydroxide
Source: MDPI journal article supplement (doi:10.3390/nano13030567), 2023-01-30
Supplement: s1 [file s1]

# Enhanced Emulsifying Ability of Deoxycholate through Dynamic Interaction with Layered Double Hydroxide

Jing Xie <sup>1,†</sup>, Kyoungyoun Lee <sup>2,†</sup>, Hyeonjin Park <sup>1</sup>, Hyun Jung <sup>2,\*</sup> and Jae-Min Oh <sup>1,\*</sup>

<sup>1</sup> Department of Energy and Materials Engineering, Dongguk University, Seoul, 04620, Republic of Korea

<sup>2</sup> Department of Chemistry, Dongguk University, Seoul, 04620, Republic of Korea

\* Correspondence: chemphile@dongguk.edu (H.J.); jaemin.oh@dongguk.edu (J.-M.O.)

† These authors contributed equally to this work.

## 1. DLS

**Table S1.** Z-average diameters and Polydispersity indices (PDI) of emulsions with respect to dilution factor of (10, 20, and 50) times for F1, F1', F2, F2', F3, and F3'.

| Sample | Z-Average Diameter (nm) |         |         | Polydispersity Indices |      |        |
|--------|-------------------------|---------|---------|------------------------|------|--------|
|        | 10                      | 20      | 50      | 10                     | 20   | 50     |
| F1     | 1,450.0                 | 2,036.3 | 2,615.0 | 0.34                   | 0.74 | ~ 1.00 |
| F1'    | 363.9                   | 355.7   | 322.0   | 0.25                   | 0.23 | 0.28   |
| F2     | 885.8                   | 844.6   | 885.9   | 0.47                   | 0.44 | 0.46   |
| F2'    | 302.7                   | 248.2   | 235.1   | 0.24                   | 0.23 | 0.31   |
| F3     | 508.4                   | 551.4   | 549.9   | 0.34                   | 0.31 | 0.30   |
| F3'    | 248.2                   | 248.5   | 249.5   | 0.28                   | 0.28 | 0.28   |

## 2. Zeta potentials

**Table S2.** Zeta potentials of emulsions diluted by 10 times for F1, F1', F2, F2', F3, and F3'.

| Sample | Zeta Potential (mV) |
|--------|---------------------|
| F1     | $-75.27 \pm 3.71$   |
| F1'    | $-35.31 \pm 3.16$   |
| F2     | $-34.84 \pm 2.22$   |
| F2'    | $-30.33 \pm 1.07$   |
| F3     | $-60.42 \pm 5.59$   |
| F3'    | $-35.75 \pm 0.83$   |

## 3. Turbiscan profiles

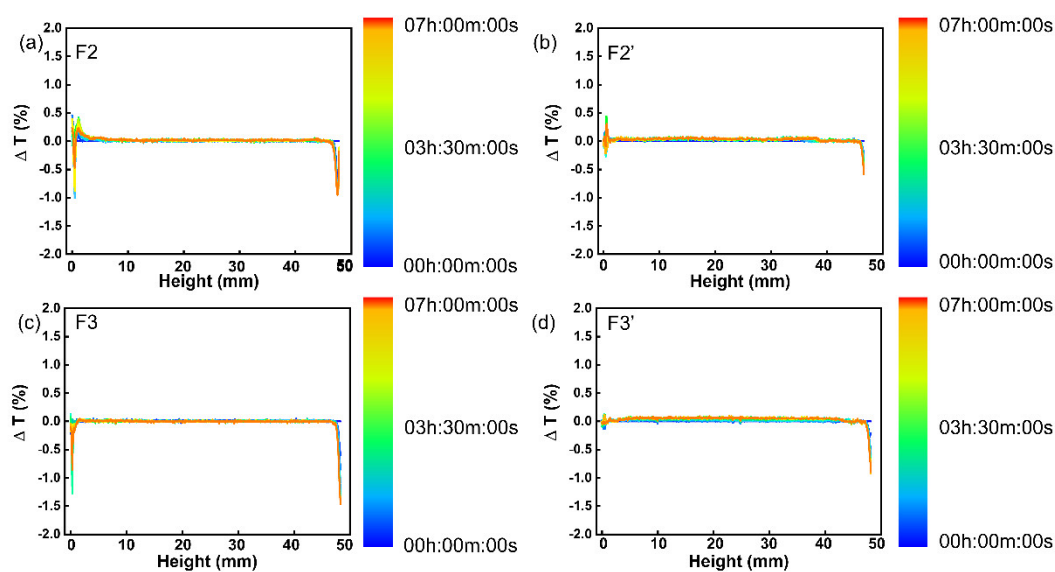

**Figure S1.** Turbiscan profiles of transmission for (a) F2, (b) F2', (c) F3, and (d) F3', over 7 hours.
